# Supplementary material for: The Feasibility of Two Handheld Spectrometers for Meat Speciation Combined with Chemometric Methods and Its Application for Halal Certification
Source: MDPI journal article supplement (doi:10.3390/foods11010071), 2021-12-29
Supplement: s1 [file s1]

## Supplementary Materials

Table S1: Classification performance (in %) of PLS-DA model<sup>1</sup> for classification of Lamb, Beef, Chicken and Pork using 6 individual spectrum of each sample for the Vis-NIR sensor.

|         |             | Intact meat <sup>2</sup> |      |       | Ground meat <sup>3</sup> |      |       |
|---------|-------------|--------------------------|------|-------|--------------------------|------|-------|
|         |             | Train                    | CV   | Test  | Train                    | CV   | Test  |
| Lamb    | Sensitivity | 98.6                     | 98.6 | 100.0 | 97.1                     | 95.7 | 100.0 |
|         | Specificity | 61.0                     | 60.7 | 71.1  | 65.5                     | 65.3 | 58.1  |
|         | Accuracy    | 79.9                     | 79.7 | 85.6  | 81.3                     | 80.5 | 79.1  |
|         | Error       | 20.1                     | 20.3 | 14.4  | 18.7                     | 19.5 | 20.9  |
| Beef    | Sensitivity | 92.2                     | 92.2 | 87.5  | 95.4                     | 95.4 | 98.5  |
|         | Specificity | 81.4                     | 81.0 | 77.8  | 86.6                     | 86.4 | 71.3  |
|         | Accuracy    | 86.8                     | 86.6 | 82.7  | 91.0                     | 91.0 | 84.9  |
|         | Error       | 13.2                     | 13.4 | 17.3  | 9.0                      | 9.0  | 15.1  |
| Chicken | Sensitivity | 96.5                     | 95.1 | 91.7  | 97.9                     | 97.9 | 97.9  |
|         | Specificity | 94.4                     | 94.6 | 92.5  | 98.3                     | 98.3 | 97.8  |
|         | Accuracy    | 95.5                     | 94.9 | 92.1  | 98.1                     | 98.1 | 97.9  |
|         | Error       | 4.5                      | 5.1  | 7.9   | 1.9                      | 1.9  | 2.1   |
| Pork    | Sensitivity | 96.7                     | 96.7 | 91.7  | 96.6                     | 96.6 | 77.8  |
|         | Specificity | 95.8                     | 95.6 | 96.8  | 96.9                     | 96.9 | 98.0  |
|         | Accuracy    | 96.3                     | 96.2 | 94.3  | 96.8                     | 96.8 | 87.9  |
|         | Error       | 3.7                      | 3.8  | 5.7   | 3.2                      | 3.2  | 12.1  |

<sup>1</sup> Cross-validation (CV): Venetian blinds (Number of data split: 10, thickness: 1)

<sup>2</sup> PLS-DA (LVs: 4) Preprocessed with MSC (mean) + Gap segment 1st derivative

<sup>3</sup> PLS-DA (LVs: 4) Preprocessed with Extended Multiplicative Scatter/Signal Correction (EMSC)

Table S2: Classification performance (in %) of PLS-DA model<sup>1</sup> for classification of Lamb, Beef, Chicken and Pork using 6 individual spectrum of each sample for the NIR sensor.

|         |             | Intact meat <sup>2</sup> |      |      | Ground meat <sup>3</sup> |      |      |
|---------|-------------|--------------------------|------|------|--------------------------|------|------|
|         |             | Train                    | CV   | Test | Train                    | CV   | Test |
| Lamb    | Sensitivity | 76.8                     | 66.1 | 73.1 | 83.3                     | 82.7 | 98.8 |
|         | Specificity | 78.1                     | 74.6 | 79.9 | 68.4                     | 68.0 | 60.6 |
|         | Accuracy    | 77.5                     | 70.4 | 76.5 | 76.0                     | 75.4 | 80.0 |
|         | Error       | 22.5                     | 29.6 | 23.5 | 24.0                     | 24.6 | 20.0 |
| Beef    | Sensitivity | 85.1                     | 82.1 | 80.8 | 89.4                     | 88.0 | 91.7 |
|         | Specificity | 83.7                     | 82.5 | 75.5 | 83.8                     | 83.5 | 93.9 |
|         | Accuracy    | 84.5                     | 82.3 | 78.2 | 86.6                     | 85.8 | 92.8 |
|         | Error       | 15.5                     | 17.7 | 21.8 | 13.4                     | 14.2 | 7.2  |
| Chicken | Sensitivity | 89.3                     | 87.5 | 81.9 | 99.3                     | 98.6 | 94.8 |
|         | Specificity | 90.1                     | 88.5 | 88.1 | 89.0                     | 89.3 | 77.5 |
|         | Accuracy    | 89.7                     | 88.0 | 85.1 | 94.2                     | 94.0 | 86.2 |
|         | Error       | 10.3                     | 12.0 | 14.9 | 5.8                      | 6.0  | 13.8 |
| Pork    | Sensitivity | 77.2                     | 78.5 | 79.6 | 85.3                     | 85.9 | 97.9 |
|         | Specificity | 81.3                     | 78.6 | 80.7 | 84.7                     | 84.7 | 89.7 |
|         | Accuracy    | 79.3                     | 78.6 | 80.2 | 85.0                     | 85.3 | 93.8 |
|         | Error       | 20.7                     | 21.4 | 19.8 | 15.0                     | 14.7 | 6.2  |

<sup>1</sup> Cross validation: Venetian blinds (Number of data split: 10, thickness: 1)

<sup>2</sup> PLS-DA (LVs: 9) Preprocessed with Median center + Gap segment 2nd derivative + OSC (Orthogonal Signal Correction)

<sup>3</sup> PLS-DA (LVs: 5) Preprocessed with MSC (mean) + 1st derivative (SavGol) (order: 2, window: 11 pt)

Table S3: Effect of different data splitting on classification performance (%) of PLS-DA model<sup>1</sup> in ground meat samples:

|         |             | Duplex algorithm |                 |      | Kennard-stone algorithm |      |      | Random algorithm<br>(average of 3 repeats) |      |      |
|---------|-------------|------------------|-----------------|------|-------------------------|------|------|--------------------------------------------|------|------|
|         |             | Train            | CV <sup>2</sup> | Test | Train                   | CV   | Test | Train                                      | CV   | Test |
| Lamb    | Sensitivity | 83.3             | 82.7            | 98.8 | 88.5                    | 88.0 | 64.8 | 87.0                                       | 86.0 | 83.4 |
|         | Specificity | 68.4             | 68.0            | 60.6 | 71.7                    | 71.5 | 76.9 | 70.5                                       | 70.6 | 69.0 |
|         | Accuracy    | 76.0             | 75.4            | 80.0 | 80.2                    | 79.8 | 70.9 | 78.9                                       | 78.4 | 76.3 |
|         | Error       | 24.0             | 24.6            | 20.0 | 19.8                    | 20.2 | 29.1 | 21.1                                       | 21.6 | 23.7 |
| Beef    | Sensitivity | 89.4             | 88.0            | 91.7 | 87.2                    | 87.2 | 92.6 | 91.2                                       | 91.0 | 81.2 |
|         | Specificity | 83.8             | 83.5            | 93.9 | 85.5                    | 84.9 | 81.7 | 87.7                                       | 87.5 | 86.6 |
|         | Accuracy    | 86.6             | 85.8            | 92.8 | 86.4                    | 86.1 | 87.2 | 89.5                                       | 89.4 | 84.0 |
|         | Error       | 13.4             | 14.2            | 7.2  | 13.6                    | 13.9 | 12.8 | 10.5                                       | 10.6 | 16.0 |
| Chicken | Sensitivity | 99.3             | 98.6            | 94.8 | 96.1                    | 95.6 | 98.3 | 95.0                                       | 95.2 | 93.8 |
|         | Specificity | 89.0             | 89.3            | 77.5 | 88.8                    | 88.2 | 83.8 | 86.9                                       | 87.0 | 86.3 |
|         | Accuracy    | 94.2             | 94.0            | 86.2 | 92.5                    | 91.9 | 91.1 | 91.1                                       | 91.3 | 90.2 |
|         | Error       | 5.8              | 6.0             | 13.8 | 7.5                     | 8.1  | 8.9  | 8.9                                        | 8.7  | 9.8  |
| Pork    | Sensitivity | 85.3             | 85.9            | 97.9 | 92.0                    | 92.0 | 80.3 | 86.8                                       | 86.4 | 88.2 |
|         | Specificity | 84.7             | 84.7            | 89.7 | 86.4                    | 86.2 | 84.7 | 85.2                                       | 85.0 | 88.2 |
|         | Accuracy    | 85.0             | 85.3            | 93.8 | 89.3                    | 89.2 | 82.5 | 86.1                                       | 85.9 | 88.3 |
|         | Error       | 15.0             | 14.7            | 6.2  | 10.7                    | 10.8 | 17.5 | 13.9                                       | 14.1 | 11.7 |

<sup>1</sup> Pre-processing: MSC (mean) + 1st derivative (SavGol) (order: 2, window: 11 pt)

<sup>2</sup> CV: cross validation

Table S4: Effect of different cross-validation on classification performance (%) of PLS-DA model<sup>1</sup> in ground meat samples:

|         |             | Venetian blinds <sup>2</sup> |      |      | Leave one out |      |      | Random subsets <sup>3</sup> |      |      |
|---------|-------------|------------------------------|------|------|---------------|------|------|-----------------------------|------|------|
|         |             | Train                        | CV   | Test | Train         | CV   | Test | Train                       | CV   | Test |
| Lamb    | Sensitivity | 83.3                         | 82.7 | 98.8 | 83.3          | 83.3 | 98.8 | 83.3                        | 83.1 | 98.8 |
|         | Specificity | 68.4                         | 68.0 | 60.6 | 68.4          | 68.4 | 60.6 | 68.4                        | 68.0 | 60.2 |
|         | Accuracy    | 76.0                         | 75.4 | 80.0 | 75.9          | 75.9 | 79.8 | 75.9                        | 75.6 | 79.8 |
|         | Error       | 24.0                         | 24.6 | 20.0 | 24.1          | 24.1 | 20.2 | 24.1                        | 24.4 | 20.2 |
| Beef    | Sensitivity | 89.4                         | 88.0 | 91.7 | 89.9          | 87.5 | 91.7 | 89.9                        | 87.4 | 91.7 |
|         | Specificity | 83.8                         | 83.5 | 93.9 | 83.8          | 83.8 | 93.9 | 83.8                        | 83.6 | 93.9 |
|         | Accuracy    | 86.6                         | 85.8 | 92.8 | 86.6          | 85.7 | 92.8 | 86.6                        | 85.6 | 92.8 |
|         | Error       | 13.4                         | 14.2 | 7.2  | 13.4          | 14.3 | 7.2  | 13.4                        | 14.4 | 7.2  |
| Chicken | Sensitivity | 99.3                         | 98.6 | 94.8 | 99.3          | 99.3 | 94.8 | 99.3                        | 99.1 | 94.8 |
|         | Specificity | 89.0                         | 89.3 | 77.5 | 89.0          | 89.0 | 77.5 | 89.0                        | 88.9 | 77.5 |
|         | Accuracy    | 94.2                         | 94.0 | 86.2 | 94.2          | 94.2 | 86.2 | 94.2                        | 94.0 | 86.2 |
|         | Error       | 5.8                          | 6.0  | 13.8 | 5.8           | 5.8  | 13.8 | 5.8                         | 6.0  | 13.8 |
| Pork    | Sensitivity | 85.3                         | 85.9 | 97.9 | 85.3          | 84.6 | 97.9 | 85.3                        | 83.9 | 97.9 |
|         | Specificity | 84.7                         | 84.7 | 89.7 | 84.9          | 84.5 | 89.7 | 84.7                        | 84.6 | 89.7 |
|         | Accuracy    | 85.0                         | 85.3 | 93.8 | 85.0          | 84.6 | 93.8 | 85.0                        | 84.3 | 93.8 |
|         | Error       | 15.0                         | 14.7 | 6.2  | 15.0          | 15.4 | 6.2  | 15.0                        | 15.7 | 6.2  |

<sup>1</sup> Pre-processing: MSC (mean) + 1st derivative (SavGol) (order: 2, window: 11 pt)

<sup>2</sup> Number of data split: 10, thickness: 1

<sup>3</sup> Number of data split: 10, number of iterations: 20
